# Supplementary material for: Mitochondrion-Directed Nanoparticles Loaded with a Natural Compound and a microRNA for Promoting Cancer Cell Death via the Modulation of Tumor Metabolism and Mitochondrial Dynamics
Source: PubMed Central journal article supplement (PMC7464316; doi:10.3390/pharmaceutics12080756), 2020-08-11
Supplement: pharmaceutics-12-00756-s001.pdf [file pharmaceutics-12-00756-s001.pdf]

# Supplementary Materials: Mitochondrion-Directed Nanoparticles Loaded with a Natural Compound and a microRNA for Promoting Cancer Cell Death via the Modulation of Tumor Metabolism and Mitochondrial Dynamics

Yu-Li Lo \*, Chen-Shen Wang, Yen-Chun Chen, Tse-Yuan Wang, Yih-Hsin Chang, Chun-Jung Chen and Ching-Ping Yang

Table S1. Antibodies used in this study.

| <b>Antibody</b>                                             | <b>Company</b> | <b>Catalog</b> |
|-------------------------------------------------------------|----------------|----------------|
| Anti-Bax                                                    | GeneTex        | GTX109683      |
| Anti-Bcl-2                                                  | GeneTex        | GTX127958      |
| Anti-PARP                                                   | Cell Signaling | 9542           |
| Anti-Caspase 3                                              | Cell Signaling | 9662           |
| Anti-Snail                                                  | Cell Signaling | C15D3          |
| Anti-Slug                                                   | Abcam          | Ab75629-100    |
| Anti-E-cadherin                                             | Cell Signaling | 3195           |
| Anti- $\beta$ -catenin                                      | ProteinTech    | 51067-2-AP     |
| Anti-P-gp                                                   | GeneTex        | GTX108370      |
| Anti-MRP1                                                   | GeneTex        | GTX116046      |
| Anti- $\beta$ -actin                                        | Millipore      | 2640549        |
| Anti-C-EBP $\alpha$                                         | Cell Signaling | 8178           |
| Anti-PPAR $\gamma$                                          | Cell Signaling | C26H12         |
| Anti-Pref-1                                                 | Cell Signaling | 2069           |
| Anti-PINK1                                                  | Bio Vision     | 3929-30T       |
| Anti-TRAP1                                                  | GeneTex        | GTX102017      |
| Anti-Atg5                                                   | Cell Signaling | 12994          |
| Anti-Beclin 1                                               | Sino           | 105332-T40     |
| Anti-RIP1                                                   | GeneTex        | GTX111074      |
| Anti-Parkin                                                 | GeneTex        | GTX65811       |
| Anti-OPA1                                                   | Cell Signaling | 80471          |
| Peroxidase-conjugated<br>AffiniPure Goat<br>Anti-Rabbit IgG | Jackson        | AB_2307391     |
